# Supplementary material
Source: PubMed Central journal article supplement (PMC8739348)
Supplement: 125_2021_5628_MOESM1_ESM.pdf [file 125_2021_5628_MOESM1_ESM.pdf]

## Electronic Supplementary Material

**ESM Table 1** Composition of the CD and CRHP diets (standardised to a 10,000 kJ/day or 2390 kcal/day energy intake) and weekly energy provision

| Diet composition (7-day menu)    | CD diet                         | CRHP diet                       |
|----------------------------------|---------------------------------|---------------------------------|
| Total carbohydrate, E%           | 50.0 ( $\pm 0.2$ )*             | 30.0 ( $\pm 0.2$ )*             |
| Simple carbohydrate, E%          | 11.4 ( $\pm 2.7$ ) <sup>§</sup> | 6.1 ( $\pm 2.8$ ) <sup>§</sup>  |
| Fibre, g                         | 48 ( $\pm 4$ ) <sup>‡</sup>     | 36 ( $\pm 6$ ) <sup>‡</sup>     |
| Total protein, E%                | 17.0 ( $\pm 0.2$ )*             | 30.0 ( $\pm 0.1$ )*             |
| Dairy protein, E%                | 3.0 ( $\pm 1.0$ )*              | 10.7 ( $\pm 1.8$ )*             |
| Animal protein, E%               | 8.9 ( $\pm 0.7$ )*              | 23.0 ( $\pm 1.0$ )*             |
| Total fat, E%                    | 33.0 ( $\pm 0.1$ )*             | 40.0 ( $\pm 0.2$ )*             |
| Saturated fatty acid, E%         | 9.9 ( $\pm 1.8$ )*              | 11.5 ( $\pm 3.0$ )*             |
| Monounsaturated fatty acid, E%   | 13.1 ( $\pm 0.7$ ) <sup>†</sup> | 18.2 ( $\pm 3.1$ ) <sup>†</sup> |
| Polyunsaturated fatty acid, E%   | 6.5 ( $\pm 1.2$ )*              | 7.0 ( $\pm 1.2$ ) <sup>†</sup>  |
| Omega-3 fatty acid, E%           | 0.8 ( $\pm 0.3$ ) <sup>§</sup>  | 0.9 ( $\pm 0.5$ ) <sup>§</sup>  |
| Trans fat, g                     | 0.9 ( $\pm 0.5$ ) <sup>§</sup>  | 0.7 ( $\pm 0.5$ ) <sup>§</sup>  |
| Cholesterol, mg                  | 375 ( $\pm 84$ ) <sup>§</sup>   | 438 ( $\pm 198$ ) <sup>§</sup>  |
| Calcium, mg                      | 878 ( $\pm 205$ ) <sup>§</sup>  | 1605 ( $\pm 512$ ) <sup>§</sup> |
| Sodium, mg                       | 2222 ( $\pm 812$ ) <sup>§</sup> | 2169 ( $\pm 707$ ) <sup>§</sup> |
| Potassium, mg                    | 3135 ( $\pm 512$ ) <sup>§</sup> | 3165 ( $\pm 630$ ) <sup>§</sup> |
| Energy provision                 | CD diet                         | CRHP diet                       |
| Estimated baseline daily TEE, kJ | 10,881 ( $\pm 2644$ )           | 11,100 ( $\pm 1523$ )           |
| Provided daily energy, kJ        |                                 |                                 |
| Week 1                           | 7784 ( $\pm 1644$ )             | 7993 ( $\pm 1436$ )             |
| Week 2                           | 7367 ( $\pm 1588$ )             | 7452 ( $\pm 1151$ )             |
| Week 3                           | 6830 ( $\pm 1677$ )             | 6963 ( $\pm 1443$ )             |
| Week 4                           | 6424 ( $\pm 1550$ )             | 6618 ( $\pm 1504$ )             |
| Week 5                           | 6235 ( $\pm 1517$ )             | 6324 ( $\pm 1373$ )             |
| Week 6                           | 8553 ( $\pm 2219$ )             | 8610 ( $\pm 1854$ )             |

Data are presented as mean ( $\pm$ SD) and were generated using Dankost Pro software. Some dietary data have suboptimal validity, defined as percentage of registered food items specifying this dietary component, weighted relatively to their energy contribution: \*  $\geq 95$ -100; †  $\geq 85$ -95; ‡  $\geq 70$ -85; §  $\geq 45$ -70. Energy per cent (E%) is calculated using the assumption of 17, 17, and 37 kJ per gram of carbohydrate, protein and fat, respectively. To convert from kJ to kcal; 1 kJ = 0.239 kcal. CD, conventional diabetes; CRHP, carbohydrate-reduced high-protein; TEE, total energy expenditure

**ESM Table 2** List of ingredients of a daily menu of the CD and CRHP diets (standardised to a 10,000 kJ/day or 2390 kcal/day energy intake)

| Breakfast, day 1                              | CD diet | CRHP diet | Dinner, day 1                                 | CD diet | CRHP diet |
|-----------------------------------------------|---------|-----------|-----------------------------------------------|---------|-----------|
| Energy, kJ                                    | 2500    | 2500      | Energy, kJ                                    | 3000    | 3000      |
| Ingredients, g                                |         |           | Ingredients, g                                |         |           |
| Bread                                         | 98      | 50        | Plaice fillet                                 | 140     | -         |
| Ryebread                                      | 50      | -         | Butter                                        | 7       | -         |
| Ham                                           | 45      | 28        | Carrot                                        | 100     | -         |
| Butter                                        | 8       | -         | Remoulade                                     | 48      | -         |
| Brie cheese                                   | 25      | -         | Apple                                         | 100     | -         |
| Raspberry jam                                 | 19      | -         | Raisins                                       | 14      | -         |
| Skyr <sup>a</sup> with vanilla<br>and topping | -       | 170       | Potato                                        | 295     | -         |
| Cheese                                        | -       | 60        | Lemon juice                                   | 3       | -         |
| Tomato                                        | -       | 30        | Rapeseed oil                                  | 5       | 3         |
| Mayonnaise                                    | -       | 11        | Green beans                                   | -       | 50        |
| <hr/>                                         |         |           | Wheat kernels                                 | -       | 50        |
| Lunch, day 1                                  |         |           | Minced beef                                   | -       | 150       |
| Energy, kJ                                    | 3000    | 3000      | Egg white                                     | -       | 80        |
| Ingredients, g                                |         |           | Oatmeal                                       | -       | 13        |
| Bread                                         | 50      | -         | Onion                                         | -       | 25        |
| Ryebread                                      | 140     | 88        | Garlic                                        | -       | 1         |
| Lunch meat, beef                              | 20      | -         | Tomato puree                                  | -       | 36        |
| Liver pâté                                    | 40      | -         | Whipping cream                                | -       | 15        |
| Tomato                                        | 80      | 100       | Cheese                                        | -       | 15        |
| Cucumber                                      | 80      | -         | <hr/>                                         |         |           |
| Ham salad                                     | 57      | -         | Snacks, day 1 (separated and consumed in two) |         |           |
| Smoked salmon                                 | -       | 60        | Energy, kJ                                    | 1500    | 1500      |
| Shrimps                                       | -       | 80        | Ingredients, g                                |         |           |
| Egg                                           | -       | 90        | Crispbread                                    | 40      | -         |
| Pesto                                         | -       | 17        | Cream cheese                                  | 40      | -         |
| Milk                                          | -       | 245       | Pear                                          | 140     | -         |
| Mayonnaise                                    | -       | 10        | Almond                                        | 6       | 39        |
|                                               |         |           | Skyr <sup>a</sup> drink                       | -       | 266       |

**ESM Table 2** (continued)

| Breakfast, day 2  | CD diet | CRHP diet | Dinner, day 2                                 | CD diet | CRHP diet |
|-------------------|---------|-----------|-----------------------------------------------|---------|-----------|
| Energy, kJ        | 2500    | 2500      | Energy, kJ                                    | 3000    | 3000      |
| Ingredients, g    |         |           | Ingredients, g                                |         |           |
| Bread             | 100     | -         | Salmon                                        | 72      | -         |
| Ryebread          | 54      | -         | Pasta                                         | 100     | -         |
| Cheese            | 20      | -         | Green beans                                   | 120     | -         |
| Egg               | 60      | -         | Juice                                         | 24      | -         |
| Chocolate, dark   | 8       | -         | Pesto                                         | 31      | -         |
| Mayonnaise        | 5       | -         | Cinnamon snail                                | 35      | -         |
| Skyr <sup>a</sup> | -       | 210       | Cod fillet                                    | -       | 130       |
| Blueberries       | -       | 100       | Ham                                           | -       | 27        |
| Crispbread        | -       | 33        | Potato                                        | -       | 100       |
| Butter            | -       | 8         | Carrot                                        | -       | 100       |
| Ham               | -       | 40        | Corn                                          | -       | 40        |
| Almonds           | -       | 16        | Cauliflower                                   | -       | 100       |
| Cucumber          | -       | 50        | Rapeseed oil                                  | -       | 8         |
| Sesame seeds      | -       | 18        | Olive oil                                     | -       | 8         |
| Lunch, day 2      |         |           | Milk                                          | -       | 240       |
| Energy, kJ        | 3000    | 3000      | Almond                                        | -       | 20        |
| Ingredients, g    |         |           | Garlic                                        | -       | 4         |
| Ryebread          | 130     | -         | Snacks, day 2 (separated and consumed in two) |         |           |
| Meatballs         | 128     | -         | Energy, kJ                                    | 1500    | 1500      |
| Carrot            | 100     | -         | Ingredients, g                                |         |           |
| Apple             | 100     | 50        | Crispbread                                    | 40      | -         |
| Pickle            | 35      | -         | Cheese                                        | 20      | -         |
| Almonds           | 10      | -         | Apple                                         | 140     | -         |
| Pita bread        | -       | 65        | Almond                                        | 12      | -         |
| Chicken           | -       | 116       | White beans                                   | -       | 42        |
| Tomato            | -       | 40        | Cream cheese                                  | -       | 14        |
| White cabbage     | -       | 40        | Cottage cheese                                | -       | 40        |
| Mozzarella        | -       | 45        | Cucumber                                      | -       | 100       |
| Milk              | -       | 250       | Cheese                                        | -       | 35        |
| Mayonnaise        | -       | 21        | Lemon juice                                   | -       | 4         |
| Parsley           | -       | 2         | Garlic                                        | -       | 2         |

<sup>a</sup> Icelandic yogurt that is rich in protein and poor in sugar

CD, conventional diabetes; CRHP, carbohydrate-reduced high-protein

**ESM Table 3** Weight loss algorithm during first the 5 weeks of intervention exemplified for a male of 110 kg, 180 cm and 65 years

**1. Energy requirements by the Mifflin St-Jeor equation**

|                                                                                                                                                        |           |           |
|--------------------------------------------------------------------------------------------------------------------------------------------------------|-----------|-----------|
| 1a. REE = $9.99 \times \text{weight} + 6.25 \times \text{height} - 4.92 \times \text{age} + 166 \times \text{sex}$ [1 for males, 0 for females] – 161) | 7992 kJ   | 1909 kcal |
| 1b. TEE = REE x PAL = 7992 kJ x 1.6                                                                                                                    | 12,787 kJ | 3054 kcal |

**2. Estimated energy intake**

|                                                                                                                                                                |            |             |
|----------------------------------------------------------------------------------------------------------------------------------------------------------------|------------|-------------|
| 2a. Weight loss target = 6% x baseline body weight = $0.06 \times 110 \text{ kg}$                                                                              | 6.6 kg     |             |
| 2b. Total energy equivalent = weight loss target x energy density of weight lost = $6.6 \text{ kg} \times 27,000 \text{ kJ/kg}^a$ (6453 kcal/kg)               | 178,200 kJ | 42,562 kcal |
| 2c. Daily energy intake (week 1) = TEE - (total energy equivalent / duration) x 80% = $12,787 \text{ kJ} - (178,200 \text{ kJ} / 35 \text{ days}) \times 0.80$ | 8714 kJ    | 2081 kcal   |
| (week 2) = TEE - (total energy equivalent / duration) x 80% = $12,787 \text{ kJ} - (178,200 \text{ kJ} / 35 \text{ days}) \times 0.80$                         | 8714 kJ    | 2081 kcal   |
| (week 3) = TEE - (total energy equivalent / duration) x 110% = $12,787 \text{ kJ} - (178,200 \text{ kJ} / 35 \text{ days}) \times 1.1$                         | 7187 kJ    | 1717 kcal   |
| (week 4) = TEE - (total energy equivalent / duration) x 110% = $12,787 \text{ kJ} - (178,200 \text{ kJ} / 35 \text{ days}) \times 1.1$                         | 7187 kJ    | 1717 kcal   |
| (week 5) = TEE - (total energy equivalent / duration) x 120% = $12,787 \text{ kJ} - (178,200 \text{ kJ} / 35 \text{ days}) \times 1.2$                         | 6678 kJ    | 1595 kcal   |

**3. Weight loss evaluation twice weekly**

- 3a. Body weight measurements and comparison with targeted value
- 3b. Adjustment of energy intake by reduction/increase in portion sizes or omission/introduction of snack meals

<sup>a</sup>Energy density reflecting lost body weight to be a mixture of adipose tissue (~75%) and lean mass (~25%) [1]

REE, resting energy expenditure; TEE, total energy expenditure; PAL, physical activity level

**ESM Table 4** List of prespecified outcomes. All outcomes are evaluated following 6 weeks of a hypo-energetic CRHP diet compared with a hypo-energetic CD diet. Complete list is available on ClinicalTrials.gov Identifier: NCT03814694

| <b>Primary outcome</b>                                                                                                                     | <b>Presented in this paper</b> |
|--------------------------------------------------------------------------------------------------------------------------------------------|--------------------------------|
| - Change in HbA <sub>1c</sub>                                                                                                              | X                              |
| <b>Secondary outcomes</b>                                                                                                                  |                                |
| - Change in hepatic fat content assessed by MR spectroscopy                                                                                | X                              |
| - Change in fasting plasma triacylglycerol                                                                                                 | X                              |
| <b>Exploratory outcomes</b>                                                                                                                |                                |
| - Change in fat content subcutaneously, viscerally and ectopically in pancreas and skeletal muscle assessed by MR imaging and spectroscopy | X                              |
| - Change in lean body mass and fat mass assessed by DXA                                                                                    | X                              |
| - Change in diurnal blood pressure assessed by intermittent 24-hour ambulatory BP monitor                                                  |                                |
| - Change in heart rate variability assessed by 48-hour Holter-monitoring                                                                   |                                |
| - Change in diurnal glycemia and glycemic variability assessed by 7-day continuous glucose monitoring                                      | X                              |
| - Change in insulin sensitivity assessed by the Composite Index following an OGTT                                                          |                                |
| - Change in beta-cell function assessed by the Insulinogenic Index and Disposition Index following an OGTT                                 |                                |
| - Change in Homeostasis Model Assessment of insulin resistance                                                                             | X                              |
| - Change in Homeostasis Model Assessment of beta-cell function                                                                             |                                |
| - Change in lipid profile including lipoprotein subfractions                                                                               |                                |
| - Change in fasting glucose, insulin, C-peptide and NEFA                                                                                   | X                              |
| - Change in glucose, insulin, C-peptide, NEFA and triacylglycerol following an OGTT                                                        |                                |
| - Change in glucagon, GLP-1, GIP, PYY, ghrelin, CCK, gastrin, GH and IGFBP-1 following an OGTT                                             |                                |
| - Change in IGF-1, leptin and adiponectin                                                                                                  |                                |
| - Change in TNF- $\alpha$ , IL-6 and hsCRP                                                                                                 |                                |
| - Change in eGFR and diurnal excretion of albumin                                                                                          | X                              |
| - Change in urinary excretion of urea                                                                                                      | X                              |
| - Change in urinary excretion of glucose                                                                                                   |                                |
| - Change in urinary oxidative DNA and RNA modifications                                                                                    |                                |
| - Change in health-related quality of life assessed by the 36-item Short-Form health survey                                                |                                |

CD, conventional diabetes; CRHP, carbohydrate-reduced high-protein; MR, magnetic resonance; DXA, dual-energy X-ray absorptiometry; BP, blood pressure; OGTT, oral glucose tolerance test; NEFA, non-esterified fatty acids; GLP-1, glucagon-like-peptide-1; GIP, glucose-dependent insulinotropic polypeptide; PYY, peptide YY; CCK, cholecystokinin; GH, growth hormone; IGFBP-1, insulin-like growth factor-binding protein 1; IGF-1, insulin-like growth factor-1; TNF- $\alpha$ , tumor necrosis factor  $\alpha$ ; IL-6, interleukin 6; hsCRP, high-sensitive C-reactive protein; eGFR, estimated glomerular filtration rate

**ESM Table 5** Between-diet differences of a CD and a CRHP diet in individuals with type 2 diabetes and overweight or obesity

| Variable                           | Model 1 <sup>a</sup>       |                |      | Model 2 <sup>b</sup>       |                |      |
|------------------------------------|----------------------------|----------------|------|----------------------------|----------------|------|
|                                    | Difference                 | <i>p</i> value | RSE  | Difference                 | <i>p</i> value | RSE  |
| <b>Anthropometry</b>               |                            |                |      |                            |                |      |
| Body weight, kg                    | 0.1 (-0.6, 0.7)            | 0.83           | 19.4 | 0.0 (-0.6, 0.7)            | 0.92           | 7.7  |
| Body mass index, kg/m <sup>2</sup> | -0.0 (-0.2, 0.2)           | 0.94           | 4.7  | -0.0 (-0.2, 0.2)           | 0.94           | 4.9  |
| Waist circumference, mm            | -0.1 (-12.4, 12.2)         | 0.99           | 108  | -0.3 (-12.5, 11.8)         | 0.96           | 47   |
| <b>Body composition</b>            |                            |                |      |                            |                |      |
| Fat free mass, kg                  | 0.5 (-0.2, 1.1)            | 0.18           | 11.8 | 0.3 (-0.4, 1.0)            | 0.40           | 6.0  |
| Fat mass, kg                       | -0.4 (-1.1, 0.3)           | 0.24           | 11.0 | -0.4 (-1.2, 0.3)           | 0.25           | 4.3  |
| Body fat fraction, %               | -0.5 (-1.0, 0.1)           | 0.10           | 5.9  | -0.5 (-1.1, 0.1)           | 0.092          | 3.3  |
| <b>Fat distribution</b>            |                            |                |      |                            |                |      |
| Hepatic fat fraction, %            | -26 (-45, 0) <sup>c</sup>  | 0.051          | 1.12 | -25 (-45, 1) <sup>c</sup>  | 0.058          | 1.08 |
| Pancreatic fat fraction, %         | 33 (7, 65) <sup>c</sup>    | 0.010          | 0.79 | 32 (6, 64) <sup>c</sup>    | 0.013          | 0.75 |
| Muscle fat fraction, %             | 15 (-12, 49) <sup>c</sup>  | 0.31           | 0.66 | 13 (-13, 48) <sup>c</sup>  | 0.35           | 0.66 |
| VAT, cm <sup>3</sup>               | 0.9 (-15.1, 17.0)          | 0.91           | 100  | -0.2 (-16.1, 15.7)         | 0.98           | 76   |
| SAT, cm <sup>3</sup>               | -5.6 (-19.4, 8.2)          | 0.42           | 120  | -7.5 (-21.0, 6.0)          | 0.27           | 58   |
| <b>Glucose metabolism</b>          |                            |                |      |                            |                |      |
| HbA <sub>1c</sub> , mmol/mol       | -1.9 (-3.5, -0.3)          | 0.018          | 8.1  | -1.9 (-3.6, -0.3)          | 0.021          | 7.6  |
| Fasting glucose, mmol/l            | -2 (-8, 5) <sup>c</sup>    | 0.64           | 0.20 | -1 (-8, 6) <sup>c</sup>    | 0.68           | 0.20 |
| Fasting insulin, pmol/l            | -1 (-16, 17) <sup>c</sup>  | 0.92           | 0.45 | -1 (-16, 17) <sup>c</sup>  | 0.87           | 0.40 |
| Fasting C-peptide, pmol/l          | 3 (-6, 14) <sup>c</sup>    | 0.50           | 0.32 | 3 (-6, 14) <sup>c</sup>    | 0.48           | 0.27 |
| HOMA2-IR                           | -1 (-18, 18) <sup>c</sup>  | 0.89           | 0.42 | -2 (-18, 17) <sup>c</sup>  | 0.83           | 0.39 |
| <b>CGM</b>                         |                            |                |      |                            |                |      |
| Diurnal mean glucose, mmol/l       | -0.8 (-1.2, -0.4)          | <0.001         | 1.91 | -0.7 (-1.1, -0.3)          | <0.001         | 1.89 |
| Coefficient of variation, %        | -4.1 (-5.9, -2.2)          | <0.001         | 4.3  | -4.2 (-5.9, -2.5)          | <0.001         | 4.2  |
| TIR (3.9-10 mmol/l), %             | -5.8 (-12.4, 0.7)          | 0.082          | 21.6 | -5.1 (-11.8, 1.7)          | 0.14           | 21.1 |
| TAR (>10 mmol/l), %                | -3.5 (-6.4, -0.6)          | 0.019          | 21.8 | -3.2 (-6.2, -0.2)          | 0.035          | 22.0 |
| TBR (<3.9 mmol/l), %               | 8.1 (2.4, 13.9)            | <0.01          | 1.70 | 8.0 (2.3, 13.8)            | <0.01          | 1.69 |
| <b>Fasting lipid profile</b>       |                            |                |      |                            |                |      |
| Triacylglycerol, mmol/l            | -18 (-29, -6) <sup>c</sup> | <0.01          | 0.45 | -17 (-28, -5) <sup>c</sup> | <0.01          | 0.44 |
| NEFA, mmol/l                       | -1 (-11, 10) <sup>c</sup>  | 0.81           | 0.31 | -1 (-11, 11) <sup>c</sup>  | 0.80           | 0.31 |
| Total cholesterol, mmol/l          | -0.2 (-0.4, 0.1)           | 0.23           | 0.95 | -0.1 (-0.4, 0.1)           | 0.33           | 0.93 |
| LDL cholesterol, mmol/l            | 0.0 (-0.2, 0.2)            | 0.98           | 0.78 | 0.0 (-0.2, 0.2)            | 0.87           | 0.74 |
| HDL cholesterol, mmol/l            | 0.02 (-0.03, 0.08)         | 0.41           | 0.28 | 0.03 (-0.02, 0.09)         | 0.25           | 0.27 |
| Non-HDL cholesterol, mmol/l        | -0.2 (-0.4, 0.1)           | 0.16           | 0.93 | -0.2 (-0.4, 0.1)           | 0.23           | 0.91 |
| ApoB, g/l                          | -0.04 (-0.10, 0.02)        | 0.17           | 0.23 | -0.03 (-0.09, 0.03)        | 0.27           | 0.23 |
| ApoA-1, g/l                        | -0.01 (-0.07, 0.04)        | 0.64           | 0.23 | -0.00 (-0.06, 0.06)        | 0.99           | 0.21 |
| ApoB/ApoA-1                        | -4 (-11, 5) <sup>c</sup>   | 0.38           | 0.30 | -3 (-11, 5) <sup>c</sup>   | 0.43           | 0.29 |

**ESM Table 5** (continued)

| Variable                                        | Model 1 <sup>a</sup>      |                |      | Model 2 <sup>b</sup>      |                |      |
|-------------------------------------------------|---------------------------|----------------|------|---------------------------|----------------|------|
|                                                 | Difference                | <i>p</i> value | RSE  | Difference                | <i>p</i> value | RSE  |
| <b>Renal function</b>                           |                           |                |      |                           |                |      |
| eGFR, ml min <sup>-1</sup> 1.73 m <sup>-2</sup> | 5.3 (-2.9, 13.5)          | 0.21           | 17.7 | 5.3 (-2.8, 13.4)          | 0.20           | 13.7 |
| Albumin, mg 24 h <sup>-1</sup>                  | 28 (-4, 69) <sup>c</sup>  | 0.090          | 1.20 | 26 (-5, 66) <sup>c</sup>  | 0.11           | 1.21 |
| Albumin/creatinine, mg/g                        | 19 (-10, 58) <sup>c</sup> | 0.23           | 1.18 | 19 (-10, 58) <sup>c</sup> | 0.21           | 1.19 |
| <b>Compliance</b>                               |                           |                |      |                           |                |      |
| Urea excretion, mmol 24 h <sup>-1</sup>         | 184 (140, 229)            | <0.001         | 123  | 185 (143, 227)            | <0.001         | 107  |
| Physical activity, MET min wk <sup>-1</sup>     | 0 (-27, 37) <sup>c</sup>  | 0.99           | 0.94 | 0 (-28, 41) <sup>c</sup>  | 0.98           | 0.92 |

Differences are estimated marginal means (95% CI), presented as absolute or relative between-diet differences (CRHP vs CD) for normally distributed or log-transformed data, respectively

<sup>a</sup> Constrained linear mixed model with inherent baseline adjustment

<sup>b</sup> Constrained linear mixed model with inherent baseline adjustment, further adjusting for differences in sex, age, BMI, diabetes duration and therapy with metformin and DPP-4 inhibitors

<sup>c</sup> Relative difference (%)

CD, conventional diabetes; CRHP, carbohydrate-reduced high-protein, RSE, residual standard error; VAT, visceral adipose tissue; SAT, subcutaneous adipose tissue; CGM, continuous glucose monitoring; TIR, time-in-range; TAR, time-above-range; TBR, time-below-range; apo, apolipoprotein

**ESM Table 6** Measures of renal function, urea excretion, and physical activity before and after matched weight loss by a CD or a CRHP diet in individuals with type 2 diabetes and overweight or obesity

| Variable                                                  | CD diet           |                               |          | CRHP diet         |                        |          | Between diets             |                |
|-----------------------------------------------------------|-------------------|-------------------------------|----------|-------------------|------------------------|----------|---------------------------|----------------|
|                                                           | Baseline          | Treatment effect              | <i>n</i> | Baseline          | Treatment effect       | <i>n</i> | Difference                | <i>p</i> value |
| <b>Renal function</b>                                     |                   |                               |          |                   |                        |          |                           |                |
| eGFR, ml min <sup>-1</sup> 1.73 m <sup>-2</sup>           | 78.1 (±17.1)      | -1.2 (±6.3)                   | 33       | 80.3 (±18.2)      | 3.6 (±23.7)            | 34       | 5.3 (-2.9, 13.5)          | 0.21           |
| Albumin, mg 24 h <sup>-1</sup>                            | 10.3 (4.0, 15.6)  | -2.5 (-8.3, 0.1) <sup>‡</sup> | 33       | 9.8 (4.4, 14.1)   | -1.6 (-5.1, 0.4)       | 34       | 28 (-4, 69) <sup>a</sup>  | 0.090          |
| Albumin/creatinine, mg/g                                  | 6.3 (3.0, 12.1)   | -1.1 (-5.6, 0.7) <sup>†</sup> | 33       | 6.1 (3.2, 10.6)   | -0.9 (-3.7, 0.2)       | 34       | 19 (-10, 58) <sup>a</sup> | 0.23           |
| <b>Compliance</b>                                         |                   |                               |          |                   |                        |          |                           |                |
| Urea excretion, mmol 24 h <sup>-1</sup>                   | 417 (±127)        | -121 (±92) <sup>‡</sup>       | 33       | 444 (±120)        | 53 (±115) <sup>‡</sup> | 34       | 184 (140, 229)            | <0.001         |
| Physical activity <sup>b</sup> , MET min wk <sup>-1</sup> | 5246 (3278, 6969) | 240 (-1438, 1089)             | 23       | 3090 (1670, 7102) | 382 (-1279, 1440)      | 30       | 0 (-27, 37) <sup>a</sup>  | 0.99           |

Data at baseline and changes from baseline are presented as means±SD or medians (25th, 75th percentiles); between-diet differences are estimated marginal means (95% CI), presented as absolute or relative differences (CRHP vs CD) for normally distributed or log-transformed data, respectively, and derived from constrained linear mixed models with inherent baseline adjustment using all available data

<sup>a</sup>Relative difference (%)

<sup>b</sup>Missing data were observed for physical activity due to inadequately or erroneously answered questionnaires

<sup>†</sup>*p*<0.01 and <sup>‡</sup>*p*<0.001 vs baseline

CD, conventional diabetes; CRHP, carbohydrate-reduced high-protein; eGFR, estimated glomerular filtration rate



**ESM Fig. 1**

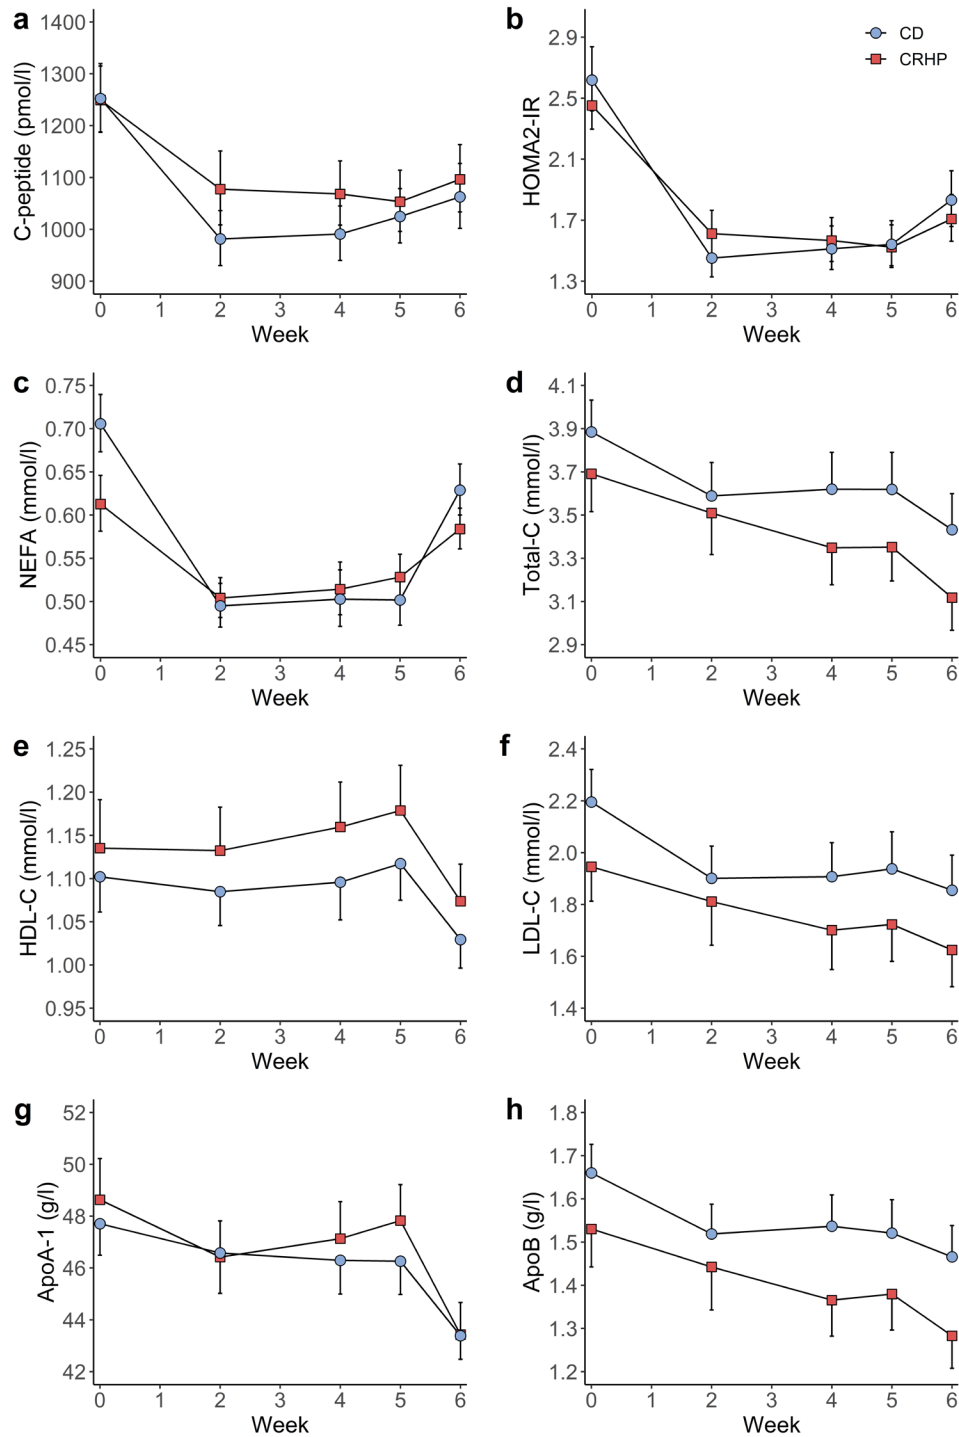

**ESM Fig. 1** Fasting measures of serum C-peptide ( $p = 0.50$ ) (a), HOMA2-IR ( $p = 0.89$ ) (b), serum NEFA ( $p = 0.81$ ) (c), serum total ( $p = 0.23$ ), HDL ( $p = 0.40$ ), and LDL ( $p = 0.98$ ) cholesterol (d-f), and apolipoprotein (apo) A-1 ( $p = 0.64$ ) and B ( $p = 0.17$ ) (g-h) during 6 weeks of a carbohydrate-reduced high-protein (CRHP) or conventional diabetes (CD) diet. Data are presented as mean with SEM error bars, including back-transformed data in (a-c) following log-transformation. Changes from baseline to week 6 were evaluated between diets, and  $p$ -values for these differences are included

## References

- [1] Hall KD (2008) What is the required energy deficit per unit weight loss? *Int J Obes (Lond)* 32(3): 573-576. 10.1038/sj.ijo.0803720
